# Supplementary material
Source: MDPI journal article supplement (https://www.mdpi.com/2073-4344/12/9/978)
Supplement: s1 [file s1 › catalysts-1878322-supplementary.pdf]

Supporting Information

# Role of $\text{SrCO}_3$ on Photocatalytic Performance of $\text{SrTiO}_3$ - $\text{SrCO}_3$ Composites

Bíborka Boga <sup>1,2</sup>, Norbert Steinfeldt <sup>1</sup>, Nikolaos G. Moustakas <sup>1</sup>, Tim Peppel <sup>1</sup>, Henrik Lund <sup>1</sup>, Jabor Rabeah <sup>1</sup>, Zsolt Pap <sup>3,4,5</sup>, Vasile-Mircea Cristea <sup>2</sup> and Jennifer Strunk <sup>1,\*</sup>

<sup>1</sup> Leibniz Institute for Catalysis (LIKAT), Albert-Einstein-Str. 29a, 18059 Rostock, Germany

<sup>2</sup> Faculty of Chemistry and Chemical Engineering, Babeş-Bolyai University, Arany János Str. 11, 400028 Cluj-Napoca, Romania

<sup>3</sup> Institute for Interdisciplinary Research on Bio-Nano-Sciences, Babeş-Bolyai University, Treboniu Laurian Str. 42, 400271 Cluj-Napoca, Romania

<sup>4</sup> Institute of Research-Development-Innovation in Applied Natural Sciences, Babeş-Bolyai University, Fântânele Str. 30, 400294 Cluj-Napoca, Romania

<sup>5</sup> Department of Applied and Environmental Chemistry, University of Szeged, Rerrich Sqr. 1, 6720 Szeged, Hungary

\* Correspondence: jennifer.strunk@catalysis.de

## Kinetics of diclofenac degradation

**Table S1.** The first-order reaction rate constants (k) in association with the determination coefficients ( $R^2$ ).

| Sample     | k (min <sup>-1</sup> ) | R <sup>2</sup> |
|------------|------------------------|----------------|
| cSTO       | 0.0542                 | 0.9931         |
| STO_5_SCO  | 0.2092                 | 0.994          |
| STO_15_SCO | 0.1503                 | 0.9885         |
| STO_21_SCO | 0.1894                 | 0.9948         |
| STO_24_SCO | 0.09                   | 0.9949         |

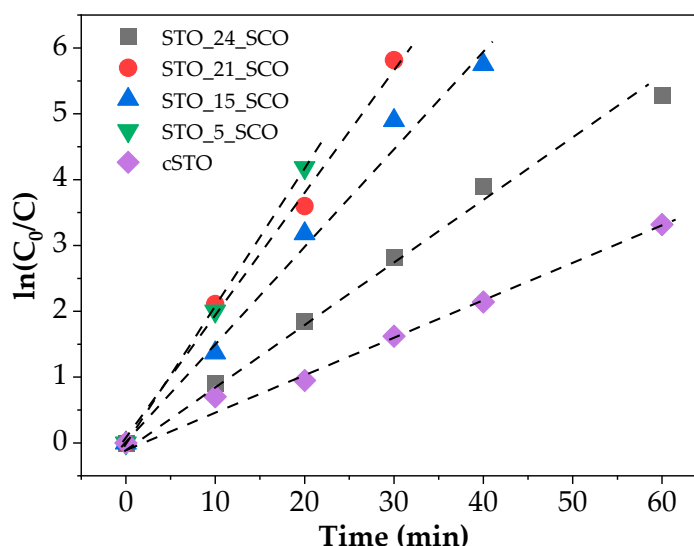

**Figure S1.** Plot of  $\ln(C_0/C)$  vs. time.

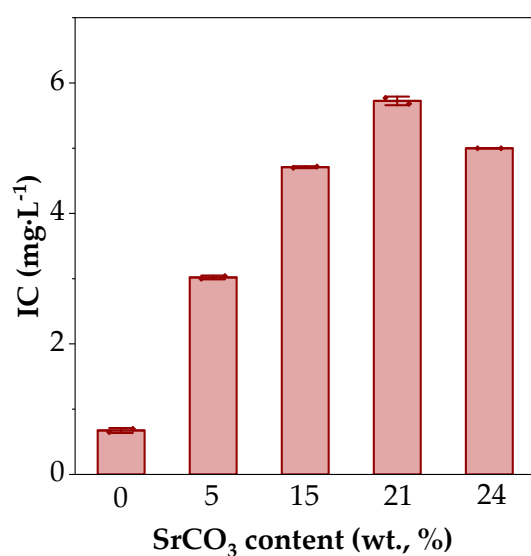

**Figure S2.** The inorganic carbon content of the final reaction mixture (IC<sub>final</sub>) *vs* SrCO<sub>3</sub> content of the fresh catalyst.

### Stability issues

The STO\_15\_SCO after the photocatalytic test was collected, dried, and analyzed *via* XRD. The Rietveld analysis was performed based on the recorded XRD (Figure S3). The as determined SrCO<sub>3</sub> content of the spent catalyst was 12 wt. %, which confirmed our assumption related to the dissolution of SrCO<sub>3</sub> after the photocatalytic experiment.

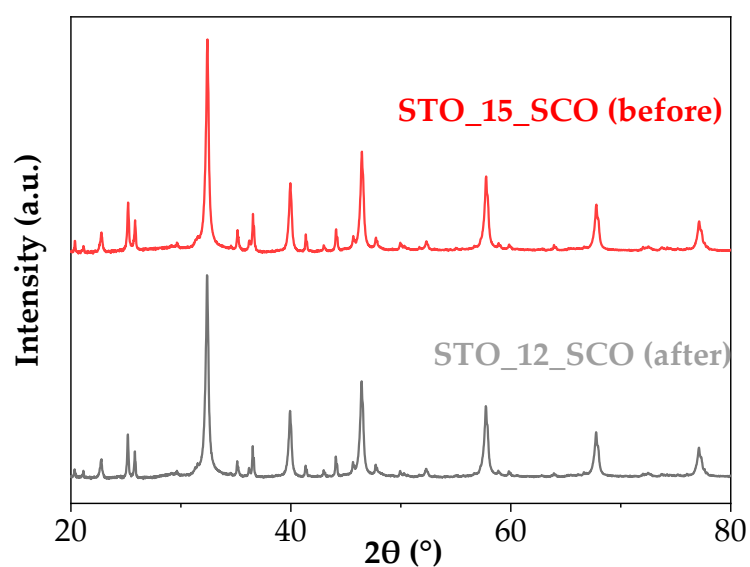

**Figure S3.** The XRD pattern of the catalyst before and after the 4 h photodegradation test.

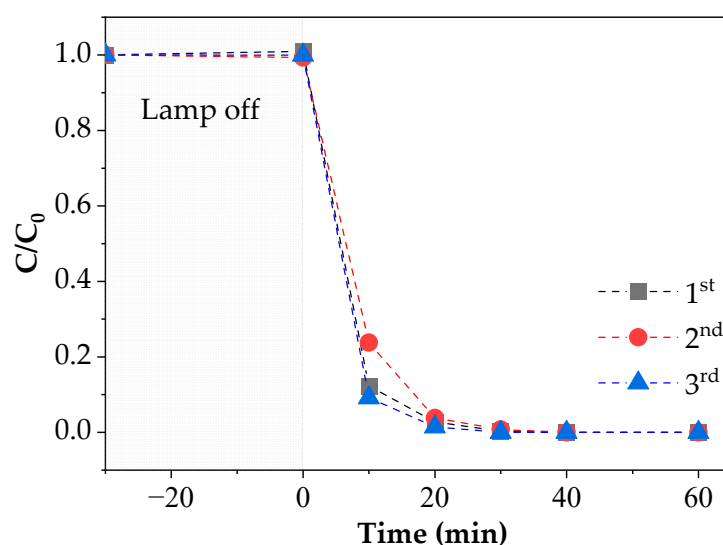

**Figure S4.** The transformation of DCFNa over 3 cycles using STO\_21\_SCO.

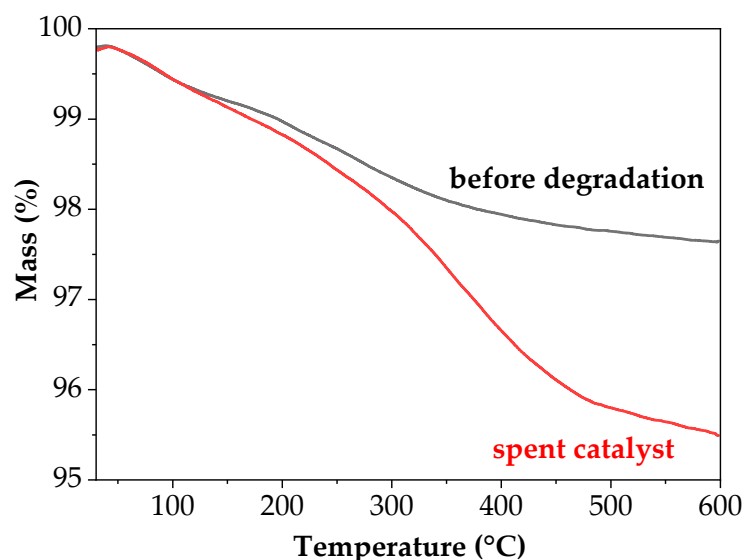

**Figure S5.** TGA thermogram for the best performing catalyst (STO\_21\_SCO) before and after degradation of DCFNa.

To find out the reason behind the deactivation of the catalyst, TGA measurements were carried out (Figure S5). The TGA thermogram of the unused STO\_21\_SCO showed a 2.4% total weight loss (in the range of 25–600 °C). This value in the case of STO\_21\_SCO after DCFNa degradation had been doubled (4.5%) in the same temperature rate. The mass loss of the catalysts below 300 °C was assigned mainly to water (both for the unused and spent catalysts). Moreover, the mass loss in the 300–450 °C region was considerable in the case of the spent catalyst, and it was associated with the desorption or “destruction” of the degradation intermediates and products. Although different approaches were applied for catalyst regeneration, namely thermal treatment (300 °C, 2 h) and washing (with H<sub>2</sub>O), the applied strategies were not effective enough. According to these results, thermal treatment at higher temperatures could be one option for the desorption of intermediates, however the modification of certain morphological and structural properties (i.e., particle size) should be considered at elevated temperatures.
